# Supplementary material for: Uptake of influenza vaccination among persons with inflammatory bowel disease, multiple sclerosis or rheumatoid arthritis: a population-based matched cohort study
Source: PubMed Central journal article supplement — CMAJ Open. 2021 May 14;9(2):E510–21. doi: 10.9778/cmajo.20200105 (PMC8157981; doi:10.9778/cmajo.20200105), 2021-05-14
Supplement: supp_9.2.E510_2020-0105-1-at.pdf [file supp_9.2.E510_2020-0105-1-at.pdf]

## Supplemental Methods and Results

### *Case Definitions: Immune-mediated inflammatory diseases*

The case definitions used to identify Manitobans with multiple sclerosis, inflammatory bowel disease and rheumatoid arthritis are delineated below. Each case definition was developed then validated using medical records review where diagnoses were affirmed according to prevailing clinical diagnostic criteria. Two of the definitions have also been validated against self-report data.<sup>1,2</sup>

**Table e1 Case Definitions for Immune-mediated Inflammatory Diseases<sup>1,3,4</sup>**

| Name | ICD9/10 codes                                                                                                                                                                                                                 | Case Definition                                                                                  | Date of Diagnosis                                                                                                                                                                                                                                                               |
|------|-------------------------------------------------------------------------------------------------------------------------------------------------------------------------------------------------------------------------------|--------------------------------------------------------------------------------------------------|---------------------------------------------------------------------------------------------------------------------------------------------------------------------------------------------------------------------------------------------------------------------------------|
| MS   | 340/ G35<br><br>DIN<br><br>02169649, 02337819<br>02281708, 02277492<br>02237317, 02237319<br>02237320, 02318253<br>02318261, 02237770<br>02269201, 02233014<br>02245169, 02286386<br>02365480, 02404508<br>02416328, 02418320 | ≥3 H or P or Rx ever                                                                             | Based on first CNS demyelinating disease claim. After identifying those who meet MS definition look to see if any of the following codes appear in hospital or physician claims earlier:<br><br>G36, 341.0, G37.8, 323, G36.9, 377.3, H46, 323.82, G37, 340, G35, 323,83, 341.9 |
| IBD  | 555.xx, 556.xx, K50, K51                                                                                                                                                                                                      | If resident in Manitoba ≥2 years:<br>≥5 H or P<br>If resident in Manitoba <2 years:<br>≥3 H or P | Based on first IBD claim                                                                                                                                                                                                                                                        |
| RA   | 714.0, M05, M06                                                                                                                                                                                                               | If resident in Manitoba ≥2 years:<br>≥5 H or P<br>If resident in Manitoba <2 years:<br>≥3 H or P | Based on first RA claim                                                                                                                                                                                                                                                         |

DIN = drug identification number, MS = multiple sclerosis, IBD = inflammatory bowel disease, RA = rheumatoid arthritis, H = hospital claims, P = physician claims, Rx = prescription claims

### *General Population Cohort Definition*

As previously described, we identified a general population cohort without the immune-mediated inflammatory diseases of interest. The source population was all Manitobans. We excluded individuals with any diagnosis codes for inflammatory bowel disease, multiple sclerosis or rheumatoid arthritis or use of any multiple sclerosis-specific disease-modifying therapies. The full case definitions for these diseases have negative predictive values of 92.4%-97.5%.<sup>1,3,4</sup> By requiring only one claim, we could

exclude individuals in whom the diagnosis had been considered, as well as individuals who might meet the diagnostic criteria in the future with negative predictive values of 99-100%.

*Administrative Definitions: Mood and Anxiety Disorders*

The case definitions for mood and anxiety disorders, depression, anxiety disorders were developed and validated against medical records in the multiple sclerosis population,<sup>5</sup> then subsequently re-validated in the inflammatory bowel disease population using the Composite International Diagnostic Interview.<sup>6</sup> The case definitions require a specific combination of hospital, physician and prescription claims (Table e2), and rely on diagnoses identified using ICD-9/10 codes and medications identified using Anatomical Therapeutic Chemical Classification codes (Table e3). Compared to medical records, the specificity for all case definitions exceeded 90%, except for anxiety (82%).

**Table e2. Administrative case definitions for identifying psychiatric comorbidity<sup>5,7</sup>**

| Psychiatric Comorbidity      | No. Years of Data | No. & Type of Claims             |
|------------------------------|-------------------|----------------------------------|
| Any mood or anxiety disorder | 2                 | ≥1 H or ≥5 P OR (≥1 P AND ≥4 Rx) |
| Depression                   | 2                 | ≥1 H or ≥5 P OR (≥1 P AND ≥7 Rx) |
| Anxiety                      | 2                 | ≥1 H or ≥2 P OR (≥1 P AND ≥2 Rx) |
| Bipolar disorder             | 5                 | ≥1 H or ≥3 P                     |

\*Use ICD-9/10 codes and ATC codes from Table e3; H = hospital claims; P = physician claims, Rx = prescription claims

**Table e3. Diagnosis and medication codes used to identify psychiatric comorbidities<sup>6,8,9</sup>**

| Comorbidity                  | ICD <sup>a</sup> -9 codes                                                                                                             | ICD <sup>a</sup> -10 codes   | ATC <sup>b</sup> codes                                                                                                                                                                                                                                            | Other Considerations                                                                                                                                                                                                                            |
|------------------------------|---------------------------------------------------------------------------------------------------------------------------------------|------------------------------|-------------------------------------------------------------------------------------------------------------------------------------------------------------------------------------------------------------------------------------------------------------------|-------------------------------------------------------------------------------------------------------------------------------------------------------------------------------------------------------------------------------------------------|
| Any mood or anxiety disorder | 300.0, 300.2, 296.0, 296.1, 296.04, 296.14, 296.4, 296.44, 296.5, 296.5, 296.54, 296.6, 296.7, 296.8, 296.2, 296.3, 298.0, 300.4, 311 | F40, F41, F31, F32, F33, F34 | Antidepressants, anticonvulsants/ mood stabilizers, anxiolytics including<br><br>N06AA01, N06AA02, N06AA04, N06AA11, N06AA12, N06AA17, N06AA21, N06AB03, N06AB04, N06AB05, N06AB06<br><br>N06AB08, N06AB10, N06AF03, N06AF04, N06AG02, N06AX06, N06AX11, N06AX16, | Anticonvulsants used were restricted to lamotrigine, carbamazepine, and valproate which are used as mood stabilizers, after excluding persons with epilepsy.<br><br>Antidepressants excluded amitriptyline, nortriptyline and buspirone because |

Appendix 1, as supplied by the authors. Appendix to: Marrie RA, Walld R, Bolton JM, et al.; CIHR Team in Defining the Burden and Managing the Effects of Psychiatric Comorbidity in Chronic Immunoinflammatory Disease. Uptake of influenza vaccination among persons with inflammatory bowel disease, multiple sclerosis or rheumatoid arthritis: a population-based matched cohort study. *CMAJ Open* 2021. doi:10.9778/cmajo.20200105. Copyright © 2021 The Author(s) or their employer(s). To receive this resource in an accessible format, please contact us at cmajgroup@cmaj.ca. Appendices are posted as supplied by authors.

|            |                                    |               |                                                                                                                                                                                                                                                               |                                                                                                                                                                                                |
|------------|------------------------------------|---------------|---------------------------------------------------------------------------------------------------------------------------------------------------------------------------------------------------------------------------------------------------------------|------------------------------------------------------------------------------------------------------------------------------------------------------------------------------------------------|
|            |                                    |               | N06AX21, N06AX23,<br>N05AB12, N05AB06,<br><br>N05AN01, N03AF01,<br>N03AG01, N03AX09                                                                                                                                                                           | of their frequent<br>off-label uses.                                                                                                                                                           |
| Depression | 296.2, 296.3, 298.0,<br>300.4, 311 | F32, F33, F34 | Antidepressants including<br><br>N06AA01, N06AA02,<br>N06AA04, N06AA11,<br>N06AA12, N06AA17,<br>N06AA21, N06AB03,<br>N06AB04, N06AB05,<br>N06AB06<br><br>N06AB08, N06AB10,<br>N06AF03, N06AF04,<br>N06AG02, N06AX06,<br>N06AX11, N06AX16,<br>N06AX21, N06AX23 | Antidepressants<br>excluded<br>amitriptyline,<br>nortriptyline and<br>buspirone because<br>of their frequent<br>off-label uses.                                                                |
| Anxiety    | 300.0, 300.2                       | F40, F41      | Anxiolytics including<br><br>N05AB12 (Alprazolam),<br><br>N05AB06 (Lorazepam)                                                                                                                                                                                 | None of the<br>antidepressants<br>were considered<br>specific for anxiety.<br>Most<br>benzodiazepines<br>were also<br>considered not to<br>be adequately<br>specific for anxiety<br>disorders. |

a – ICD: International Classification of Disease; b – ATC: Anatomic Therapeutic Chemical System

**Table e4 Tariff and procedure codes to identify surgeries for inflammatory bowel disease<sup>8,10</sup>**

| Procedure                        | Physician Claim Tariff Codes |
|----------------------------------|------------------------------|
| Intestinal suture                | 3221, 3223                   |
| Colostomy                        | 3195                         |
| Colectomy                        | 3179                         |
| Colectomy, proctectomy           | 3180, 3181, 3182, 3183, 3184 |
| Proctosigmoidectomy              | 3286                         |
| Proctosigmoidectomy, proctectomy | 3288, 3289, 3290             |
| Rectal surgery                   | 3301                         |
| Small bowel resection            | 3201, 3174                   |

Appendix 1, as supplied by the authors. Appendix to: Marrie RA, Walld R, Bolton JM, et al.; CIHR Team in Defining the Burden and Managing the Effects of Psychiatric Comorbidity in Chronic Immunoinflammatory Disease. Uptake of influenza vaccination among persons with inflammatory bowel disease, multiple sclerosis or rheumatoid arthritis: a population-based matched cohort study. *CMAJ Open* 2021. doi:10.9778/cmajo.20200105. Copyright © 2021 The Author(s) or their employer(s). To receive this resource in an accessible format, please contact us at [cmajgroup@cmaj.ca](mailto:cmajgroup@cmaj.ca). Appendices are posted as supplied by authors.

|                                               |                                                                                        |
|-----------------------------------------------|----------------------------------------------------------------------------------------|
| Ileostomy                                     | 3193                                                                                   |
|                                               | <b>Hospital Procedures</b>                                                             |
| Incision, excision & anastomosis of intestine | 45, excluding 451 & 452 diagnostic procedures<br>1NM – colon + 59, 87, 89, 92 excision |

**Table e5 Diagnostic and procedure codes to identify joint-related procedures for rheumatoid arthritis<sup>6,8</sup>**

| Procedure                                         | ICD-9-CM code              | CCI code                                                                           |
|---------------------------------------------------|----------------------------|------------------------------------------------------------------------------------|
| Hip replacement (incl. Partial, total, revisions) | 81.50, 81.51, 81.53, 81.52 | 1.VA.53.LA-PN^^ or<br>1.VA.53.PN-PN^^<br><br>1.VA.53.LA-PM^^ or<br>1.VA.53.PN-PM^^ |
| Knee replacement                                  | 81.54, 81.55               | 1.VG.53.LA-PN or 1.VG.53.LA-PP                                                     |
| Elbow replacement                                 | 81.84                      | 1.TM.80.^^                                                                         |
| Shoulder replacement                              | 81.80, 81.81, 81.83        | 1.TA.53.^^                                                                         |
| Wrist fusion                                      | 81.25, 81.26               | 1.UB.75.^^, 1.UG.75.^^                                                             |
| Ankle fusion                                      | 81.1                       | 1.WA.75.^^                                                                         |
| Foot joint fusion                                 | 81.1                       | 1.WE.75.^^                                                                         |
| Foot joint replacement                            | 81.57                      | 1.WJ.53.^^                                                                         |
| Cervical spine fusion                             | 81.01, 81.02, 81.03        | 1.SA.75.^^                                                                         |
| Hand joint replacement                            | 81.7                       | 1.UC.53.^^, 1.UC.55. ^^                                                            |

ICD-9-CM = International Classification of Diseases, 9<sup>th</sup> revision, Clinical Modification; CCI = Canadian Classification of Intervention code. ^ CCI codes are 10 characters long and broken into components. The first number in the code followed by 2 letters indicates anatomical location or development stage. Subsequent codes provide more specific information about the intervention. The ^ indicates that ll of the codes with more specific indicators were included.

**Table e6. Immune therapies used for management of inflammatory bowel disease, multiple sclerosis and rheumatoid arthritis (including Anatomic Therapeutic Chemical Classification Codes)**

| <b>Treatment</b>                                                   | <b>Inflammatory Bowel Disease</b> | <b>Multiple Sclerosis</b>     | <b>Rheumatoid Arthritis</b>     |
|--------------------------------------------------------------------|-----------------------------------|-------------------------------|---------------------------------|
| <b>Disease</b>                                                     |                                   |                               |                                 |
| <b>Corticosteroids<sup>1</sup></b>                                 | Methylprednisolone (H02AB04)      | Methylprednisolone (H02AB04)  | Methylprednisolone (H02AB04)    |
|                                                                    | Prednisolone (H02AB06)            | Prednisolone (H02AB06)        | Prednisolone (H02AB06)          |
|                                                                    | Prednisone (H02AB07)              | Prednisone (H02AB07)          | Prednisone (H02AB07)            |
|                                                                    | Budesonide                        |                               | Triamcinolone (H02AB08)         |
|                                                                    | Hydrocortisone (enema)            |                               | Cortisone (H02AB10))            |
| <b>Anti-inflammatory or Immunomodulatory therapies<sup>2</sup></b> | 5-ASA (A07EC02, A07EC03)          | Glatiramer acetate (L03AX13)  | Sulfasalazine (A07EC01)         |
|                                                                    | Sulfasalazine (A07EC01)           | Interferon-beta 1a (L03AB07)  | Sodium aurothiomalate (M01CB01) |
|                                                                    |                                   | Interferon-beta 1b (L03AB08)  | Auranofin (M01CB03)             |
|                                                                    |                                   | Dimethyl fumarate (N07XX09)   | Aurothioglucose (M01CB04)       |
|                                                                    |                                   | Teriflunomide (L04AA31)       | Penicillamine (M01CC01)         |
|                                                                    |                                   | Peg interferon-beta (L03AB13) | Hydroxychloroquine (P01BA02)    |
| <b>Traditional immunosuppressive therapies<sup>3</sup></b>         | Azathioprine (L04AX01)            | Azathioprine (L04AX01)        | Azathioprine (L04AX01)          |
|                                                                    | Methotrexate (L04AX03)            | Methotrexate (L04AX03)        | Methotrexate (L04AX03)          |
|                                                                    | 6-mercaptopurine (L01BB02)        | Mitoxantrone (L01DB07)        | Cyclophosphamide (L01AA01)      |

Appendix 1, as supplied by the authors. Appendix to: Marrie RA, Walld R, Bolton JM, et al.; CIHR Team in Defining the Burden and Managing the Effects of Psychiatric Comorbidity in Chronic Immuno-inflammatory Disease. Uptake of influenza vaccination among persons with inflammatory bowel disease, multiple sclerosis or rheumatoid arthritis: a population-based matched cohort study. *CMAJ Open* 2021. doi:10.9778/cmajo.20200105. Copyright © 2021 The Author(s) or their employer(s). To receive this resource in an accessible format, please contact us at [cmajgroup@cmaj.ca](mailto:cmajgroup@cmaj.ca). Appendices are posted as supplied by authors.

|                                               |                        |                                    |                        |
|-----------------------------------------------|------------------------|------------------------------------|------------------------|
|                                               | Cyclosporine (L04AA01) | Cyclophosphamide (L01AA01)         | Cyclosporine (L04AA01) |
|                                               | Tacrolimus (L04AD02)   |                                    | Leflunomide (L04AA13)  |
| <b>Novel therapies/ Biologics<sup>3</sup></b> | Infliximab (L04AA12)   | Natalizumab (L04AA23)              | Infliximab (L04AA12)   |
|                                               | adalimumab (L04AA17)   | Fingolimod (L04AA27)               | adalimumab (L04AA17)   |
|                                               | Golimumab (L04AB06)    | Alemtuzumab (L04AA34)              | Etanercept (L04AA11)   |
|                                               | Ustekinumab (L04AC05)  | Cladribine <sup>4</sup> (L04AA40)  | Anakinra (L04AA14)     |
|                                               | Vedolizumab (L04AA33)  | Ocrelizumab <sup>4</sup> (L04AA36) | Rituximab (L01XC02)    |
|                                               |                        |                                    | Abatacept (L04AA24)    |
|                                               |                        |                                    | Tocilizumab (L04AC07)  |
|                                               |                        |                                    | Tofacitinib (L04AA29)  |
|                                               |                        |                                    | Golimumab (L04AB06)    |
|                                               |                        |                                    | Certolizumab (L04AB05) |

- 1- Corticosteroids were not included as immune therapies for multiple sclerosis because they are not used as an chronic therapy, but exclusively for episodic treatment of relapses. 2- Therapies in this row in the multiple sclerosis column were considered first-line. 3- Therapies in this row in the multiple sclerosis column were considered second-line. 4- Not available during the study period.

Table e7. Crude percentage of persons with immune-mediated disease and matched controls who received influenza vaccinations annually, stratified according to mood/anxiety disorder status

| Year | Matched Controls         |                            | Immune-Mediated Disease Cases |                            |
|------|--------------------------|----------------------------|-------------------------------|----------------------------|
|      | No Mood/Anxiety Disorder | With Mood/Anxiety Disorder | No Mood/Anxiety Disorder      | With Mood/Anxiety Disorder |
| 1984 | 3.74<br>(3.50, 4.00)     | 6.42<br>(5.19, 7.92)       | 6.71<br>(6.01, 7.50)          | 10.69<br>(7.74, 14.59)     |
| 1985 | 4.34<br>(4.11, 4.59)     | 7.81<br>(6.79, 8.96)       | 7.28<br>(6.62, 8.01)          | 9.02<br>(7.00, 11.54)      |
| 1986 | 5.18<br>(4.94, 5.43)     | 8.56<br>(7.67, 9.55)       | 8.44<br>(7.77, 9.17)          | 11.53<br>(9.60, 13.80)     |
| 1987 | 5.61<br>(5.36, 5.86)     | 9.34<br>(8.52, 10.24)      | 8.48<br>(7.82, 9.17)          | 10.12<br>(8.51, 12.00)     |
| 1988 | 6.41<br>(6.16, 6.67)     | 9.63<br>(8.87, 10.44)      | 10.08<br>(9.39, 10.81)        | 11.00<br>(9.49, 12.71)     |
| 1989 | 7.40<br>(7.14, 7.67)     | 11.19<br>(10.45, 11.98)    | 11.23<br>(10.53, 11.98)       | 13.15<br>(11.65, 14.80)    |
| 1990 | 9.23<br>(8.95, 9.52)     | 12.79<br>(12.06, 13.56)    | 13.77<br>(13.01, 14.56)       | 15.74<br>(14.23, 17.37)    |
| 1991 | 11.55<br>(11.24, 11.86)  | 15.85<br>(15.09, 16.63)    | 16.96<br>(16.15, 17.81)       | 19.16<br>(17.61, 20.80)    |
| 1992 | 12.79<br>(12.47, 13.11)  | 17.22<br>(16.48, 17.98)    | 18.02<br>(17.20, 18.88)       | 20.46<br>(18.96, 22.05)    |
| 1993 | 14.29<br>(13.97, 14.62)  | 18.33<br>(17.62, 19.07)    | 20.50<br>(19.64, 21.38)       | 21.77<br>(20.33, 23.29)    |
| 1994 | 14.21<br>(13.89, 14.54)  | 18.23<br>(17.56, 18.93)    | 21.26<br>(20.41, 22.15)       | 23.37<br>(21.96, 24.83)    |
| 1995 | 12.63<br>(12.33, 12.94)  | 16.21<br>(15.60, 16.83)    | 17.78<br>(16.99, 18.61)       | 18.92<br>(17.70, 20.20)    |

Table e8. Age- and sex-standardized\* percentage of persons with immune-mediated disease and matched cohorts who received influenza vaccinations annually (\*to 2010 Canadian population)

| Year | Immune-mediated disease |                         | Inflammatory bowel disease |                         | Multiple sclerosis      |                         | Rheumatoid arthritis    |                         |
|------|-------------------------|-------------------------|----------------------------|-------------------------|-------------------------|-------------------------|-------------------------|-------------------------|
|      | Controls                | Cases                   | Controls                   | Cases                   | Controls                | Cases                   | Controls                | Cases                   |
| 1984 | 3.25<br>(3.03, 3.48)    | 6.08<br>(5.42, 6.83)    | 2.96<br>(2.46, 3.56)       | 6.00<br>(4.58, 7.86)    | 3.01<br>(2.53, 3.58)    | 6.07<br>(4.66, 7.89)    | 3.43<br>(3.13, 3.77)    | 5.73<br>(4.85, 6.79)    |
| 1985 | 3.91<br>(3.70, 4.14)    | 6.51<br>(5.90, 7.18)    | 3.89<br>(3.38, 4.47)       | 7.45<br>(6.01, 9.24)    | 3.52<br>(3.05, 4.07)    | 5.74<br>(4.55, 7.25)    | 4.14<br>(3.85, 4.46)    | 6.33<br>(5.51, 7.27)    |
| 1986 | 4.61<br>(4.40, 4.84)    | 7.77<br>(7.14, 8.45)    | 4.63<br>(4.11, 5.21)       | 8.46<br>(7.01, 10.21)   | 4.50<br>(4.01, 5.06)    | 7.71<br>(6.37, 9.32)    | 4.65<br>(4.37, 4.95)    | 7.43<br>(6.58, 8.39)    |
| 1987 | 4.99<br>(4.78, 5.21)    | 7.65<br>(7.06, 8.30)    | 5.06<br>(4.55, 5.62)       | 7.42<br>(6.16, 8.95)    | 4.49<br>(4.02, 5.02)    | 7.94<br>(6.57, 9.59)    | 5.19<br>(4.90, 5.50)    | 7.79<br>(6.93, 8.77)    |
| 1988 | 5.60<br>(5.38, 5.83)    | 8.93<br>(8.31, 9.59)    | 5.70<br>(5.20, 6.25)       | 9.40<br>(8.05, 10.98)   | 5.65<br>(5.13, 6.21)    | 8.60<br>(7.29, 10.13)   | 5.71<br>(5.39, 6.05)    | 8.69<br>(7.84, 9.63)    |
| 1989 | 6.41<br>(6.19, 6.64)    | 10.22<br>(9.58, 10.91)  | 6.69<br>(6.18, 7.25)       | 10.81<br>(9.44, 12.38)  | 6.15<br>(5.64, 6.71)    | 9.33<br>(7.99, 10.90)   | 6.58<br>(6.28, 6.91)    | 9.98<br>(9.09, 10.95)   |
| 1990 | 7.82<br>(7.59, 8.07)    | 12.40<br>(11.70, 13.14) | 7.90<br>(7.37, 8.47)       | 13.89<br>(12.40, 15.55) | 7.84<br>(7.28, 8.44)    | 11.44<br>(9.95, 13.16)  | 7.86<br>(7.53, 8.20)    | 11.83<br>(10.90, 12.82) |
| 1991 | 9.78<br>(9.52, 10.05)   | 15.19<br>(14.44, 15.98) | 9.98<br>(9.40, 10.59)      | 16.69<br>(15.12, 18.42) | 9.60<br>(8.99, 10.24)   | 13.19<br>(11.63, 14.96) | 9.86<br>(9.50, 10.23)   | 14.92<br>(13.87, 16.05) |
| 1992 | 10.59<br>(10.33, 10.86) | 15.98<br>(15.23, 16.77) | 10.51<br>(9.95, 11.11)     | 15.99<br>(14.53, 17.59) | 10.67<br>(10.05, 11.33) | 14.38<br>(12.77, 16.21) | 10.66<br>(10.31, 11.03) | 16.26<br>(15.18, 17.40) |
| 1993 | 11.75<br>(11.48, 12.02) | 17.90<br>(17.13, 18.70) | 11.71<br>(11.14, 12.31)    | 18.87<br>(17.35, 20.54) | 11.49<br>(10.85, 12.17) | 16.59<br>(14.83, 18.57) | 12.19<br>(11.69, 12.72) | 18.19<br>(17.01, 19.45) |
| 1994 | 11.53<br>(11.27, 11.80) | 18.37<br>(17.62, 19.15) | 11.60<br>(11.05, 12.18)    | 18.98<br>(17.51, 20.56) | 11.33<br>(10.73, 11.97) | 17.21<br>(15.51, 19.10) | 11.53<br>(11.16, 11.90) | 18.40<br>(17.31, 19.55) |
| 1995 | 9.91<br>(9.68, 10.14)   | 15.02<br>(14.36, 15.71) | 9.96<br>(9.47, 10.48)      | 15.33<br>(14.05, 16.73) | 9.92<br>(9.36, 10.52)   | 13.95<br>(12.47, 15.60) | 9.97<br>(9.65, 10.30)   | 15.59<br>(14.55, 16.70) |
| 1996 | 8.45<br>(8.25, 8.66)    | 13.82<br>(13.19, 14.50) | 8.35<br>(7.91, 8.81)       | 14.31<br>(13.09, 15.64) | 8.31<br>(7.80, 8.86)    | 12.83<br>(11.39, 14.44) | 8.56<br>(8.29, 8.84)    | 13.79<br>(12.88, 14.76) |
| 1997 | 8.28<br>(8.08, 8.48)    | 13.33<br>(12.74, 13.96) | 8.31<br>(7.89, 8.76)       | 14.19<br>(13.04, 15.45) | 8.27<br>(7.78, 8.80)    | 13.01<br>(11.34, 14.91) | 8.33<br>(8.07, 8.61)    | 13.11<br>(12.29, 13.97) |
| 1998 | 8.01<br>(7.82, 8.20)    | 12.84<br>(12.27, 13.44) | 8.15<br>(7.76, 8.57)       | 13.32<br>(12.24, 14.49) | 8.10<br>(7.62, 8.60)    | 12.38<br>(10.74, 14.28) | 8.03<br>(7.77, 8.29)    | 12.88<br>(12.0, 13.73)  |

Appendix 1, as supplied by the authors. Appendix to: Marrie RA, Walld R, Bolton JM, et al.; CIHR Team in Defining the Burden and Managing the Effects of Psychiatric Comorbidity in Chronic Immunoinflammatory Disease. Uptake of influenza vaccination among persons with inflammatory bowel disease, multiple sclerosis or rheumatoid arthritis: a population-based matched cohort study. *CMAJ Open* 2021. doi:10.9778/cmajo.20200105. Copyright © 2021 The Author(s) or their employer(s). To receive this resource in an accessible format, please contact us at [cmajgroup@cmaj.ca](mailto:cmajgroup@cmaj.ca). Appendices are posted as supplied by authors.



|      |                         |                         |                         |                         |                         |                         |                         |                         |
|------|-------------------------|-------------------------|-------------------------|-------------------------|-------------------------|-------------------------|-------------------------|-------------------------|
| 1999 | 8.70<br>(8.50, 8.90)    | 14.64<br>(14.04, 15.27) | 8.93<br>(8.52, 9.35)    | 15.20<br>(14.08, 16.42) | 8.88<br>(8.39, 9.40)    | 14.08<br>(12.48, 15.90) | 8.69<br>(8.41, 8.98)    | 15.24<br>(14.29, 16.26) |
| 2000 | 13.98<br>(13.73, 14.24) | 22.72<br>(21.94, 23.53) | 14.01<br>(13.52, 14.52) | 23.25<br>(21.90, 24.68) | 14.25<br>(13.58, 14.95) | 22.60<br>(20.59, 24.80) | 14.17<br>(13.73, 14.63) | 22.85<br>(21.61, 24.16) |
| 2001 | 14.23<br>(13.98, 14.49) | 22.95<br>(22.18, 23.75) | 14.20<br>(13.72, 14.70) | 23.26<br>(21.95, 24.65) | 14.34<br>(13.70, 15.00) | 22.67<br>(20.40, 25.20) | 14.58<br>(14.20, 14.98) | 23.44<br>(21.88, 25.12) |
| 2002 | 15.14<br>(14.88, 15.40) | 23.74<br>(22.99, 24.52) | 14.89<br>(14.41, 15.39) | 24.43<br>(23.12, 25.81) | 15.31<br>(14.64, 16.01) | 22.90<br>(21.15, 24.78) | 15.63<br>(15.14, 16.14) | 23.62<br>(22.44, 24.87) |
| 2003 | 20.26<br>(19.96, 20.57) | 31.46<br>(30.50, 32.45) | 19.79<br>(19.25, 20.34) | 32.36<br>(30.80, 34.01) | 20.06<br>(19.37, 20.78) | 29.66<br>(27.63, 31.83) | 20.99<br>(20.43, 21.58) | 30.59<br>(29.25, 31.98) |
| 2004 | 20.94<br>(20.64, 21.26) | 32.10<br>(31.16, 33.06) | 21.04<br>(20.49, 21.60) | 32.78<br>(31.26, 34.38) | 20.67<br>(19.97, 21.39) | 30.46<br>(28.39, 32.69) | 21.18<br>(20.69, 21.67) | 32.00<br>(30.57, 33.50) |
| 2005 | 22.91<br>(22.59, 23.24) | 35.79<br>(34.75, 36.86) | 22.86<br>(22.30, 23.44) | 36.13<br>(34.55, 37.78) | 23.07<br>(22.25, 23.92) | 36.87<br>(33.58, 40.49) | 23.18<br>(22.63, 23.75) | 35.69<br>(33.73, 37.77) |
| 2006 | 22.05<br>(21.73, 22.38) | 32.92<br>(31.97, 33.91) | 22.12<br>(21.57, 22.68) | 33.53<br>(32.04, 35.10) | 22.15<br>(21.29, 23.04) | 32.13<br>(29.67, 34.78) | 22.05<br>(21.54, 22.57) | 33.45<br>(31.37, 35.66) |
| 2007 | 21.89<br>(21.58, 22.21) | 32.69<br>(31.76, 33.65) | 21.79<br>(21.26, 22.34) | 33.31<br>(31.8, 34.84)  | 22.06<br>(21.34, 22.80) | 32.36<br>(30.30, 34.56) | 22.12<br>(21.51, 22.75) | 32.33<br>(30.56, 34.20) |
| 2008 | 21.34<br>(21.03, 21.65) | 32.43<br>(31.48, 33.41) | 21.10<br>(20.58, 21.63) | 32.86<br>(31.39, 34.39) | 21.09<br>(20.39, 21.81) | 32.36<br>(30.25, 34.61) | 21.43<br>(20.95, 21.92) | 32.22<br>(30.46, 34.08) |
| 2009 | 22.25<br>(21.93, 22.57) | 34.44<br>(33.48, 35.44) | 22.06<br>(21.54, 22.59) | 34.37<br>(32.91, 35.89) | 22.18<br>(21.44, 22.93) | 37.23<br>(32.87, 42.17) | 22.26<br>(21.73, 22.81) | 33.98<br>(32.22, 35.82) |
| 2010 | 23.31<br>(22.99, 23.63) | 34.10<br>(33.16, 35.07) | 22.62<br>(22.10, 23.15) | 34.95<br>(33.49, 36.47) | 23.08<br>(22.36, 23.82) | 33.03<br>(30.89, 35.32) | 23.80<br>(23.27, 24.36) | 33.73<br>(32.04, 35.51) |
| 2011 | 22.46<br>(22.15, 22.77) | 32.38<br>(31.46, 33.33) | 22.10<br>(21.60, 22.62) | 32.97<br>(31.55, 34.45) | 22.60<br>(21.85, 23.38) | 32.47<br>(30.42, 34.65) | 22.66<br>(22.07, 23.27) | 31.82<br>(30.37, 33.33) |
| 2012 | 22.40<br>(22.09, 22.72) | 31.44<br>(30.52, 32.38) | 22.34<br>(21.84, 22.86) | 32.69<br>(31.31, 34.12) | 21.75<br>(21.07, 22.45) | 30.41<br>(28.37, 32.60) | 22.18<br>(21.68, 22.68) | 30.92<br>(29.42, 32.49) |
| 2013 | 25.16<br>(24.82, 25.51) | 34.18<br>(33.26, 35.12) | 24.81<br>(24.28, 25.35) | 35.50<br>(34.09, 36.96) | 25.37<br>(24.56, 26.20) | 33.42<br>(31.27, 35.71) | 25.43<br>(24.66, 26.23) | 33.59<br>(32.07, 35.17) |
| 2014 | 24.71<br>(24.37, 25.05) | 33.57<br>(32.63, 34.53) | 24.45<br>(23.93, 24.98) | 35.25<br>(33.82, 36.74) | 25.24<br>(24.47, 26.04) | 33.28<br>(31.17, 35.53) | 24.60<br>(23.86, 25.35) | 32.83<br>(30.42, 35.42) |
| 2015 | 23.69<br>(23.36, 24.02) | 31.53<br>(30.63, 32.45) | 23.65<br>(23.14, 24.17) | 33.12<br>(31.75, 34.54) | 24.19<br>(23.43, 24.97) | 31.37<br>(29.46, 33.41) | 23.18<br>(22.65, 23.72) | 30.98<br>(28.76, 33.38) |

Appendix 1, as supplied by the authors. Appendix to: Marrie RA, Walld R, Bolton JM, et al.; CIHR Team in Defining the Burden and Managing the Effects of Psychiatric Comorbidity in Chronic Immuno-inflammatory Disease. Uptake of influenza vaccination among persons with inflammatory bowel disease, multiple sclerosis or rheumatoid arthritis: a population-based matched cohort study. *CMAJ Open* 2021. doi:10.9778/cmajo.20200105. Copyright © 2021 The Author(s) or their employer(s). To receive this resource in an accessible format, please contact us at [cmajgroup@cmaj.ca](mailto:cmajgroup@cmaj.ca). Appendices are posted as supplied by authors.

Table e9. Multivariable risk differences for the association of immune-mediated disease, any mood/anxiety disorder and uptake of influenza vaccination (Percentage; 95% confidence interval) adjusting for covariates including annual physician visits

| <b>Variable</b>                                                            | <b>Immune-mediated disease</b> | <b>Inflammatory bowel disease</b> | <b>Multiple sclerosis</b> | <b>Rheumatoid arthritis</b> |
|----------------------------------------------------------------------------|--------------------------------|-----------------------------------|---------------------------|-----------------------------|
| Controls without a mood/anxiety disorder                                   | 0                              | 0                                 | 0                         | 0                           |
| Immune-mediated disease effect without a mood/anxiety disorder effect      | 5.34<br>(4.70, 5.98)           | 6.24<br>(5.20, 7.29)              | 5.75<br>(4.22, 7.29)      | 4.30<br>(3.35, 5.26)        |
| Mood/anxiety disorder effect without an immune-mediated disease effect     | 3.53<br>(3.19, 3.87)           | 4.12<br>(3.55, 4.69)              | 4.34<br>(3.57, 5.11)      | 2.69<br>(2.19, 3.20)        |
| Interaction contrast between case effect and mood/anxiety disorder effect* | -1.15<br>(-2.01, -0.28)        | -1.28<br>(-2.72, 0.17)            | 0.26<br>(-1.75, 2.28)     | -1.57<br>(-2.92, -0.32)     |

\*A negative interaction contrast with a confidence interval that does not include zero indicates a subadditive effect; that is, the joint effect of immune-mediated disease and mood/anxiety disorder is less than the sum of their individual effects. A positive interaction with a confidence interval that does not include zero indicates a superadditive effect that is greater than the sum of the individual immune-mediated disease and mood/anxiety disorder effects.

Figure e1. Percentage of the Immune-mediated inflammatory disease (IMID) and matched cohorts immunized against influenza in 2015 stratified by age group

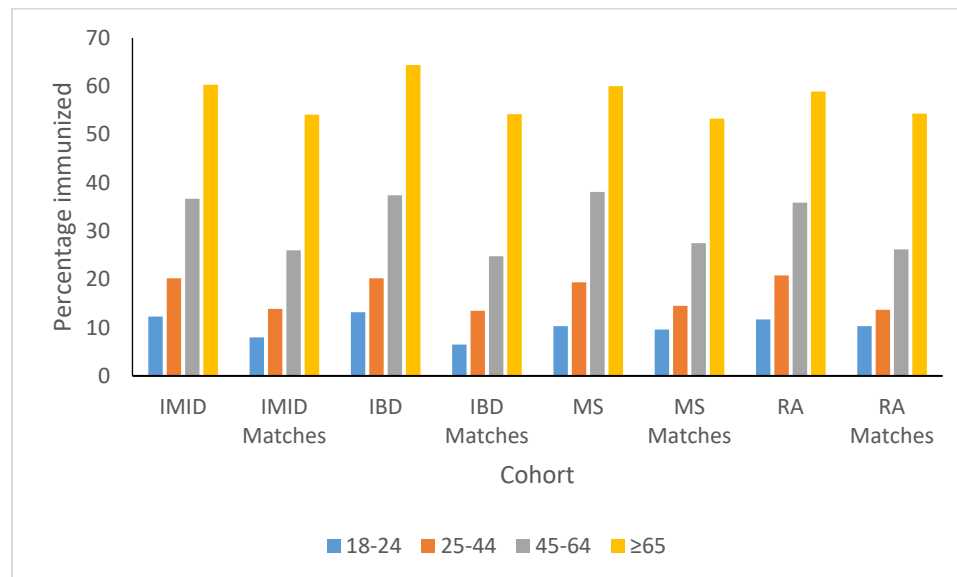

## References

- Bernstein CN, Blanchard JF, Rawsthorne P, Wajda A. Epidemiology of Crohn's Disease and Ulcerative Colitis in a central Canadian Province: A population-based study. *Am J Epidemiol.* 1999;149:916-24.
- Marrie RA, Yu N, Blanchard JF, Leung S, Elliott L. The rising prevalence and changing age distribution of multiple sclerosis in Manitoba. *Neurology.* 2010;74:465-71.
- Al-Sakran LH, Marrie RA, Blackburn DF, Knox KB, Evans CD. Establishing the Incidence and Prevalence of Multiple Sclerosis in Saskatchewan. *The Canadian Journal of Neurological Sciences.* . 2018;45:295-303.
- Hitchon CA, Khan S, Elias B, Lix LM, Peschken CA. Prevalence and Incidence of Rheumatoid Arthritis in Canadian First Nations and Non-First Nations People: A Population-Based Study. *J Clin Rheumatol.* 2019.
- Marrie RA, Walker JR, Graff LA, et al. Performance of administrative case definitions for depression and anxiety in inflammatory bowel disease. *Journal of Psychosomatic Research.* 2016;89:107-13.
- Medicode (Firm). ICD-9-CM: International Classification of Diseases, 9th revision, clinical modification. 1996.
- Marrie RA, Fisk JD, Yu BN, et al. Mental comorbidity and multiple sclerosis: validating administrative data to support population-based surveillance. *BMC Neurology.* 2013;13:16.
- Canadian Institute for Health Information. ICD-10-CA/CCI, Version 2015. International Statistical Classification of Diseases and Related Health Problems, Tenth Revision. 2015.
- WHO Collaborating Centre for Drug Statistics Methodology. Anatomic Therapeutic Chemical Classification System. 2011; [http://www.whocc.no/atc/structure\\_and\\_principles/](http://www.whocc.no/atc/structure_and_principles/). Accessed August 9, 2012.
- Minister of Health. *Manitoba Physician's Manual.* Winnipeg: Manitoba Health and Health Living;2015.
